# Supplementary material for: Controlling the oxidation of bis-tridentate cobalt(ii) complexes having bis(2-pyridylalkyl)amines: ligand vs. metal oxidation
Source: Royal Society of Chemistry journal article supplement (doi:10.1039/c7dt01792h), 2017-01-01
Supplement: c7dt01792h1.pdf [file c7dt01792h1.pdf]

## Supporting Information

### Controlling oxidation of bis-tridentate cobalt(II) complexes having bis(2-pyridylalkyl)amines: Ligand vs. metal oxidation

S. Anjana,<sup>\*a</sup> S. Donring,<sup>b</sup> P. Sanjib,<sup>c</sup> B. Varghese<sup>d</sup> and Narasimha N. Murthy<sup>a</sup>

#### Table of Contents

|                                                                                              |    |
|----------------------------------------------------------------------------------------------|----|
| 1. Packing diagram of <b>2</b> (“tpy embrace”) (Fig. S1)                                     | 2  |
| 2. FT-IR of Co(II) amine complex, <b>1</b> (Fig. S2)                                         | 2  |
| 3. FT-IR of Co(II) imine complex, <b>2</b> (Fig. S3)                                         | 3  |
| 4. UV-Vis of Co(II)-amine complex <b>1</b> (Fig. S4)                                         | 3  |
| 5. UV-Vis of Co(II)-imine complex <b>2</b> (Fig. S5)                                         | 4  |
| 6. ESI-MS of Co(II) amine complex <b>1</b> (Fig. S6)                                         | 4  |
| 7. ESI-MS of Co(II) imine complex <b>2</b> (Fig. S7)                                         | 5  |
| 8. Representation of the isomeric forms of <b>1</b> at 238 K (Scheme S1)                     | 5  |
| 9. <sup>1</sup> H NMR spectra of imine complex <b>2</b> at 298 and 238 K (Fig. S8)           | 6  |
| 10. <sup>1</sup> H- <sup>1</sup> H COSY of <b>2</b> (0 to 80 ppm) (Fig. S9)                  | 6  |
| 11. Assignment of signals in the <sup>1</sup> H NMR spectrum of <b>2</b> (Table S1 and S2)   | 7  |
| 12. Curie plots of <b>2</b> (Fig. S10)                                                       | 8  |
| 13. CV of <b>1</b> and <b>2</b> (Fig. S11)                                                   | 8  |
| 14. <sup>1</sup> H NMR spectral changes of <b>1</b> on exposure to O <sub>2</sub> (Fig. S12) | 9  |
| 15. UV-Vis spectra of <b>2</b> in CH <sub>3</sub> CN in presence of acid (Fig. S13)          | 9  |
| 16. UV-Vis spectra of Co(III) complex <b>4</b> (Fig. S14)                                    | 10 |
| 17. <sup>1</sup> H NMR spectrum of Co(III) Complex <b>4</b> in D <sub>2</sub> O (Fig. S15)   | 10 |
| 18. ESI-MS of Co(III) complex <b>4</b> (Fig. S16)                                            | 11 |

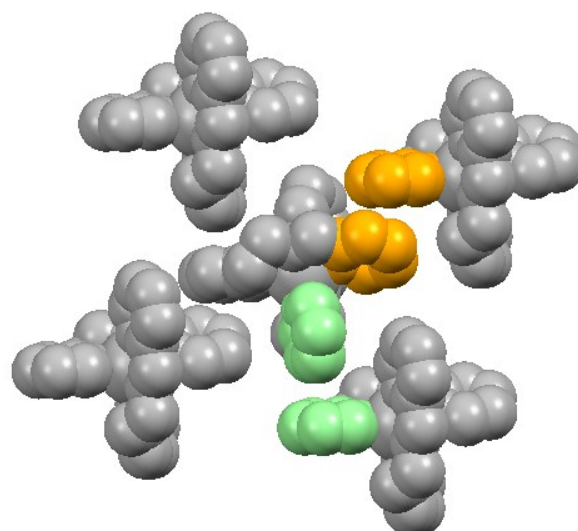

**Figure S1.** Part of a sheet of  $[\text{Co}(\text{pepmi})_2]^{2+}$  cations in **2** showing “tpy embrace”. H- atoms and counter anions are omitted for clarity

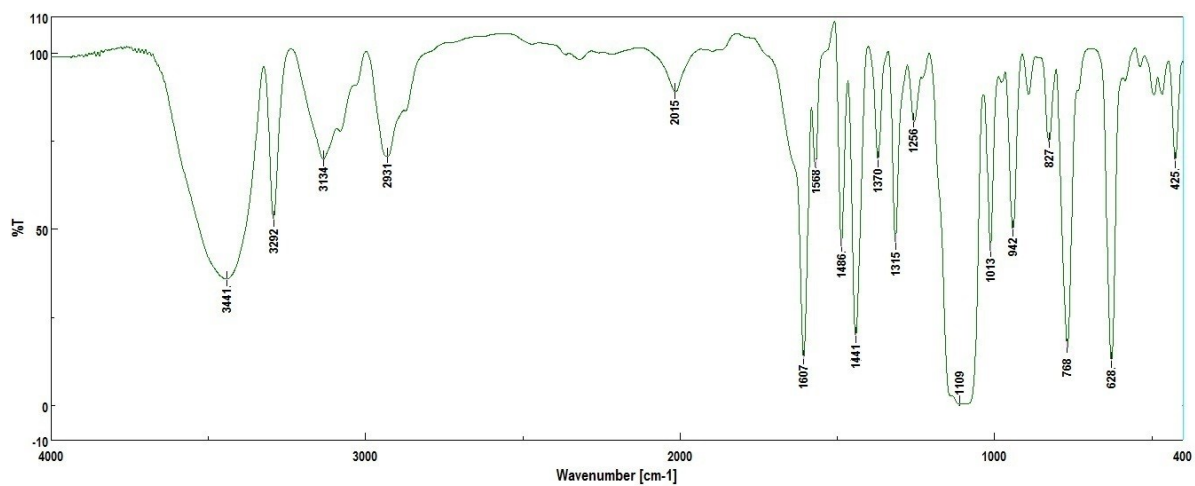

**Figure S2.** FT-IR of Co(II) amine complex **1** (characteristic -NH stretch is seen at  $3292\text{ cm}^{-1}$ )

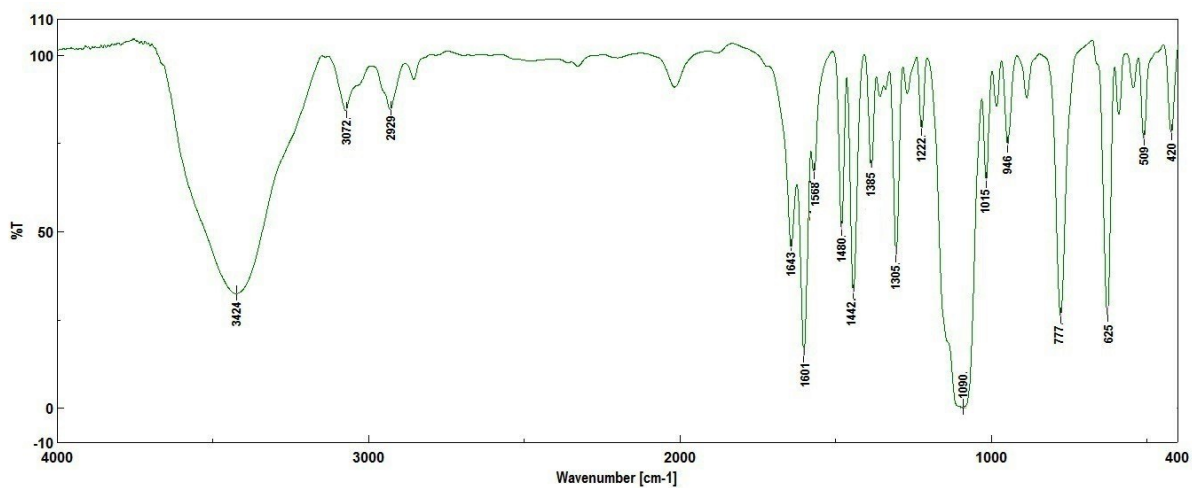

**Figure S3.** FT-IR of Co(II) imine complex **2** (-NH stretch is absent and characteristic  $\text{-C=N}$  stretch is seen at  $1643\text{ cm}^{-1}$ )

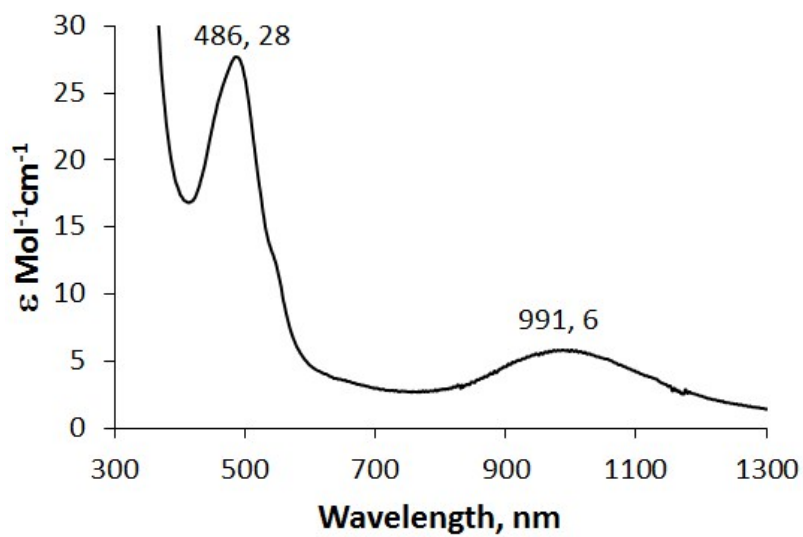

**Figure S4.** UV-Vis of of Co(II) amine complex **1** in  $\text{CH}_3\text{CN}$

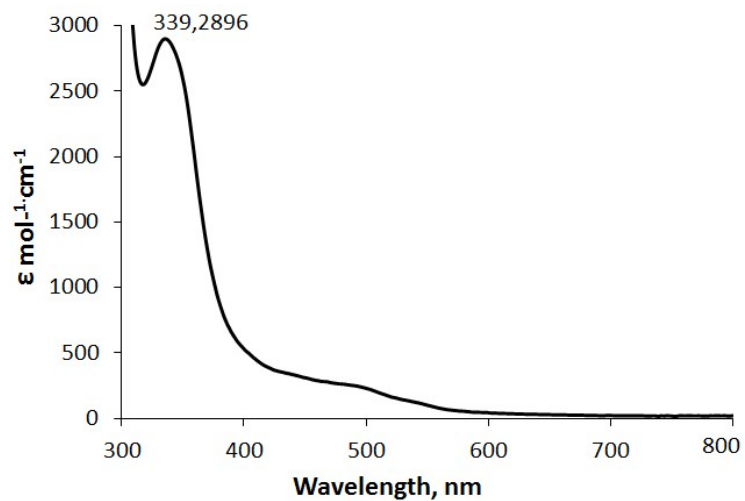

**Figure S5.** UV-Vis of Co(II) imine complex **2** in CH<sub>3</sub>CN

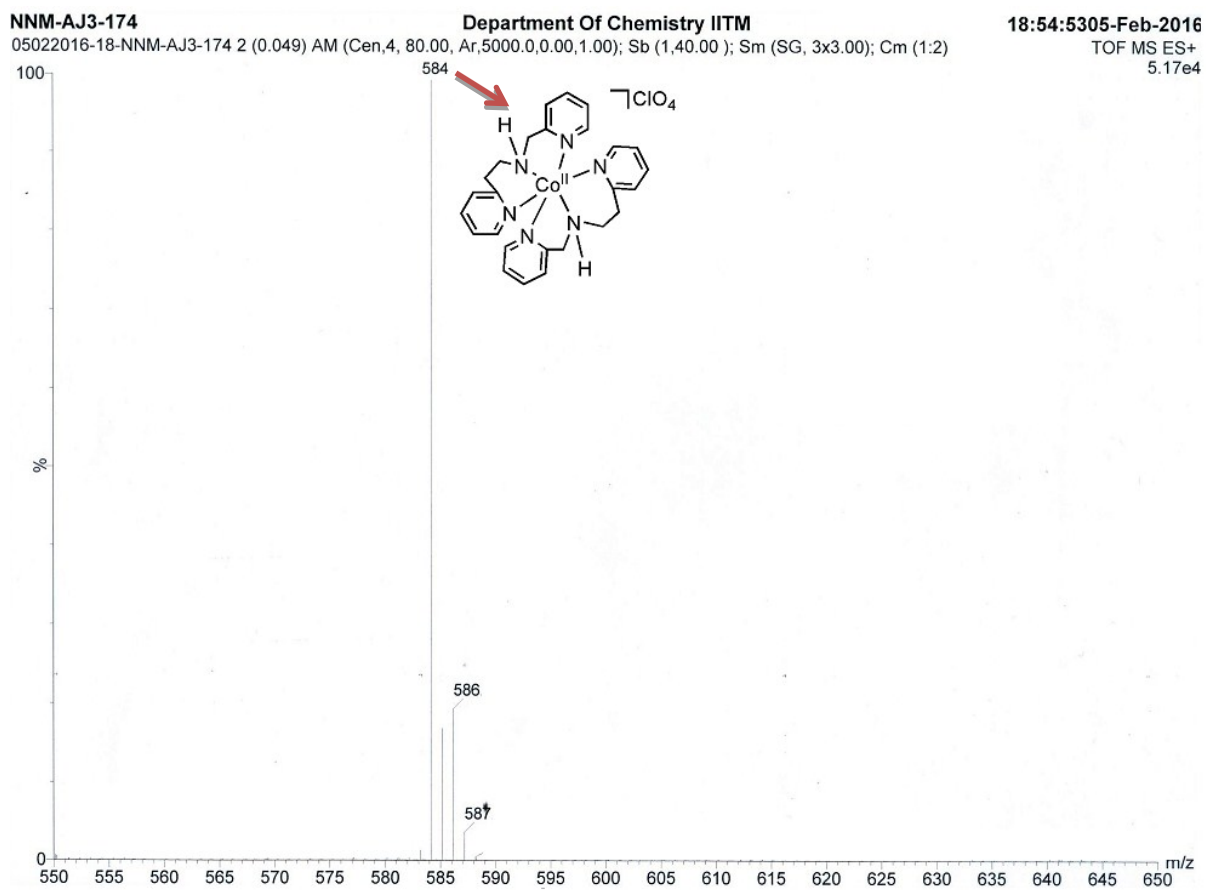

**Figure S6.** ESI-MS of Co(II) amine complex **1**

NNM-SP4-2B

NNM-SP4-2B 29 (0.286) Sb (1.40.00); Sm (Mn, 2x2.00); Cm (29:38)

Department Of Chemistry IITM

18:22:0111-Mar-2015

TOF MS ES+  
1.55e4

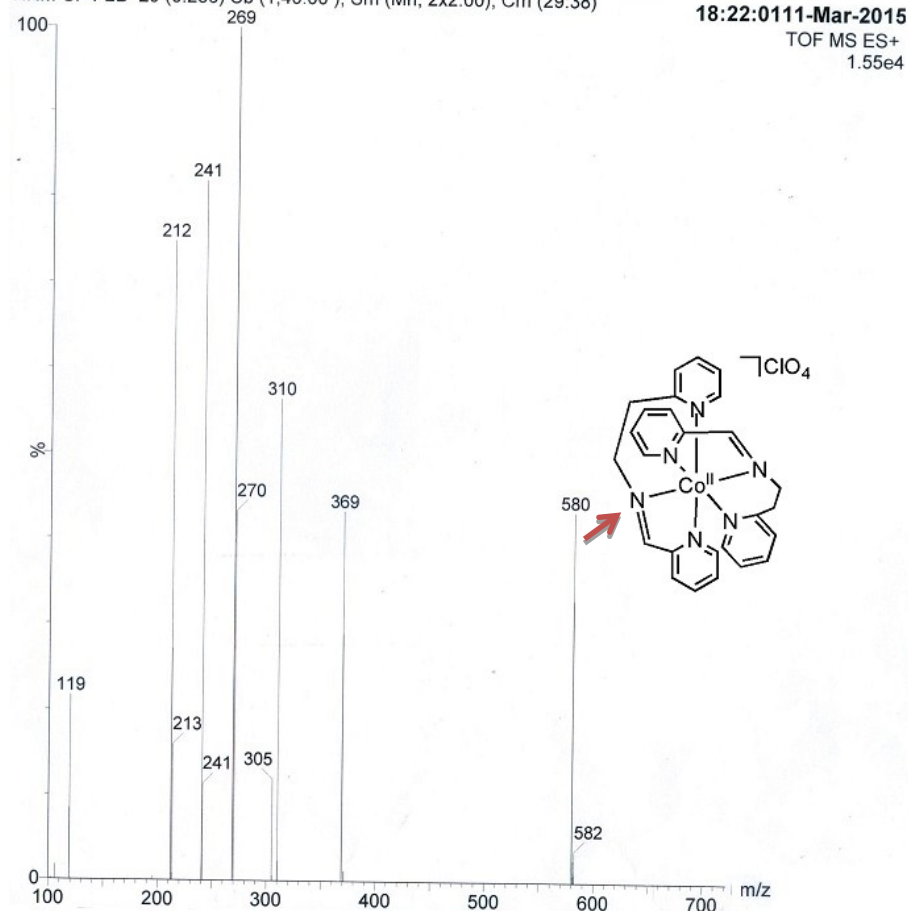

Figure S7. ESI-MS of Co(II) imine complex 2

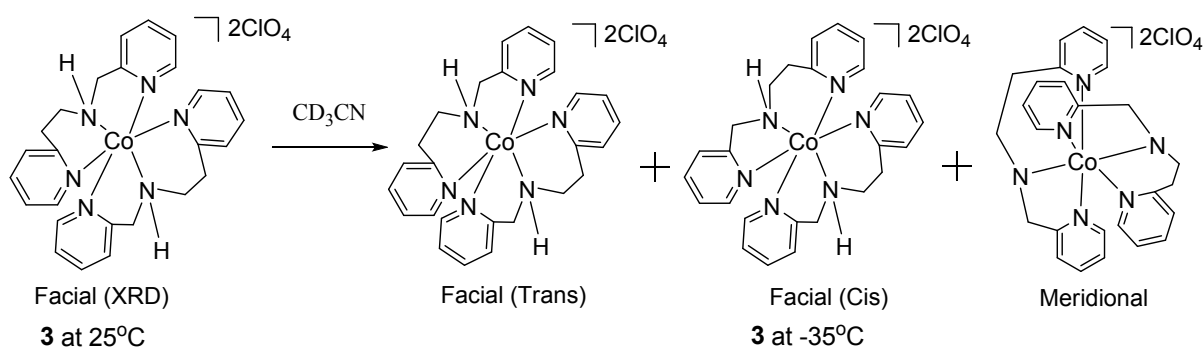

Scheme S1. Representation of the isomeric forms of 1 expected to exist at 238 K

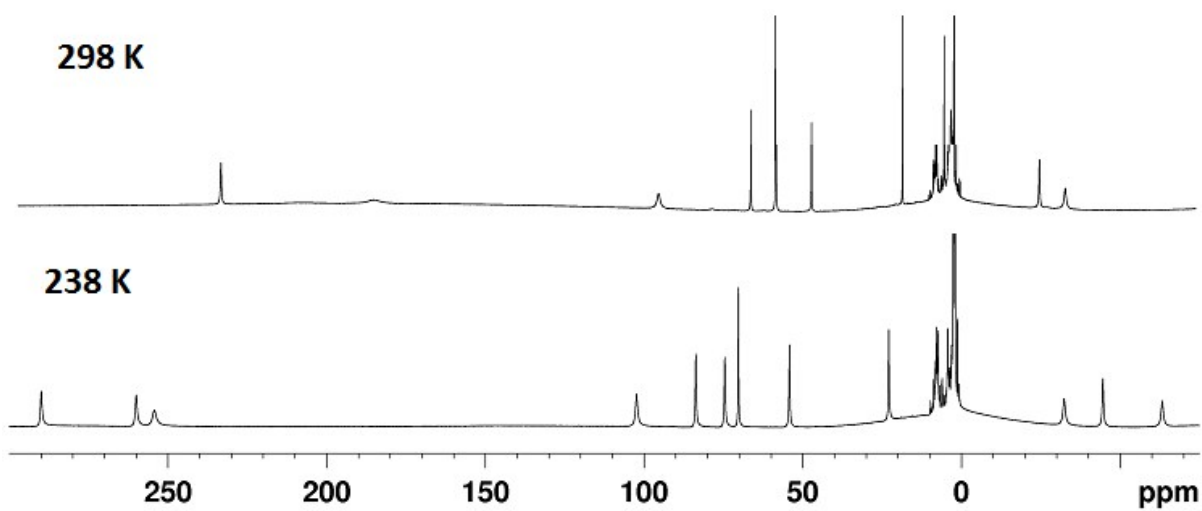

**Figure S8.** <sup>1</sup>H NMR spectra of Co(II) imine complex **2** in CD<sub>3</sub>CN at 298 and 238 K

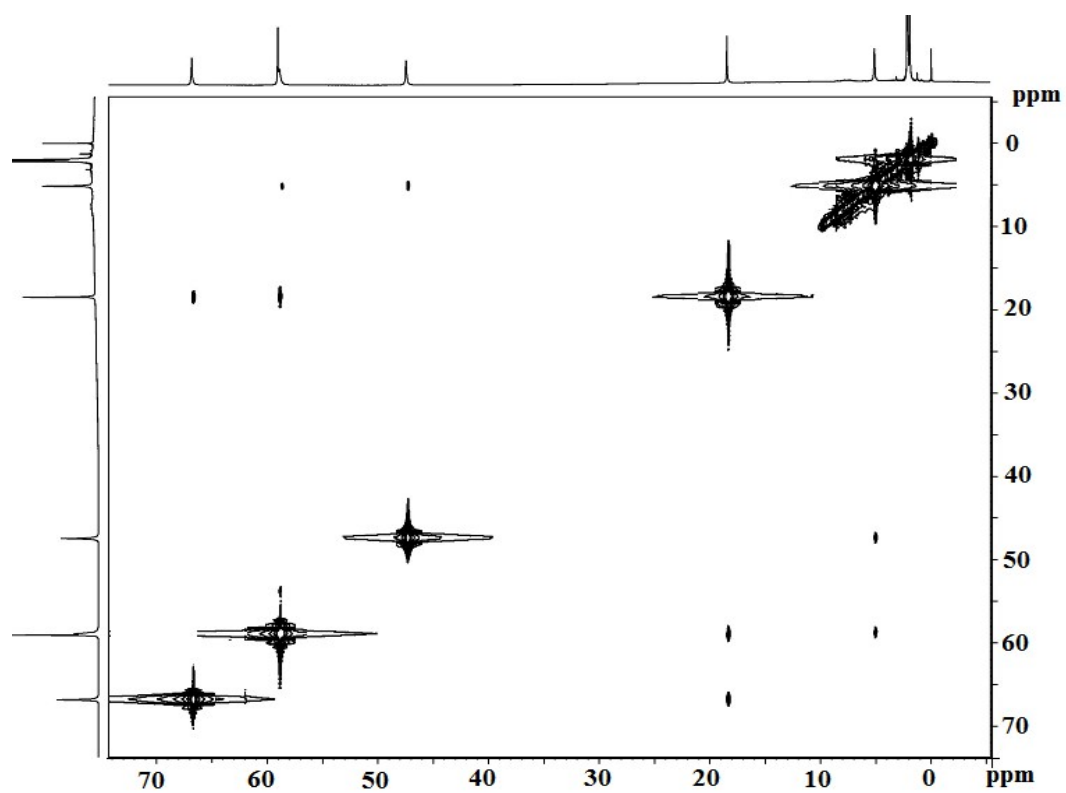

**Figure S9.** <sup>1</sup>H-<sup>1</sup>H COSY of **2** (0 to 80 ppm) in CD<sub>3</sub>CN at 298 K

| Signal Position, ppm | T1(ms) | Fwh (Hz) | T2(ms) | R <sub>Co-H</sub> (Å) (X-ray) | R <sub>Co-H</sub> (Å) (Soln) | Assignment       |
|----------------------|--------|----------|--------|-------------------------------|------------------------------|------------------|
| 235.33               | 6.26   | 150.55   | 2.11   | 3.14 <sub>av</sub>            | 3.66                         | o-Py             |
| 96.02                | 2.94   | 452.05   | 0.70   | 3.69 <sub>av</sub>            | 3.23                         | -CH <sub>2</sub> |
| 66.66                | 31.81  | 40.31    | 7.90   | 5.17                          | 4.80                         | m-py             |
| 58.86                | 39.07  | 25.89    | 12.30  | 5.08                          | 4.97                         | m-py             |
| 47.34                | 46.82  | 41.05    | 7.76   | 5.06                          | 5.12                         | m-py             |
| 18.40                | 98.28* | 23.30    | 13.66  | 5.79*                         | -                            | p-py             |
| 5.16                 | 89.39  | 30.80    | 10.33  | 5.84                          | 5.70                         | p-py             |
| -25.17               | 2.89   | 135.32   | 2.35   | 3.75 <sub>av</sub>            | 3.22                         | -CH <sub>2</sub> |
| -33.37               | 13.70  | 272.22   | 1.16   | 3.80                          | 4.17                         | =CH              |

**Table S1.** Assignment of resonances in the paramagnetic <sup>1</sup>H NMR spectrum of **2** in CD<sub>3</sub>CN at 298 K.  $T_2 = 1/\pi(\text{Fwh})$ , Fwh is full width at half-height. Calculated  $R_{\text{Co-H}} = R_{\text{ref}}(T_1/T_{\text{ref}})^{1/6}$ , where  $R_{\text{ref}}$  and  $T_{\text{ref}}$  are reference (\*) values

| Peak Position at -35°C | Assignment       |
|------------------------|------------------|
| 289.87                 | o-Py             |
| 260.06                 | o-Py             |
| 254.36                 | -CH <sub>2</sub> |
| 102.39                 | -CH <sub>2</sub> |
| 83.73                  | m-py             |
| 74.59                  | m-py             |
| 70.29                  | m-py             |
| 54.20                  | m-py             |
| 22.90                  | p-py             |
| 4.31                   | p-py             |
| -32.39                 | =CH              |
| -44.58                 | -CH <sub>2</sub> |
| -63.29                 | -CH <sub>2</sub> |

**Table S2.** Assignment of resonances in the paramagnetic <sup>1</sup>H NMR spectrum of **2** in CD<sub>3</sub>CN at 238 K

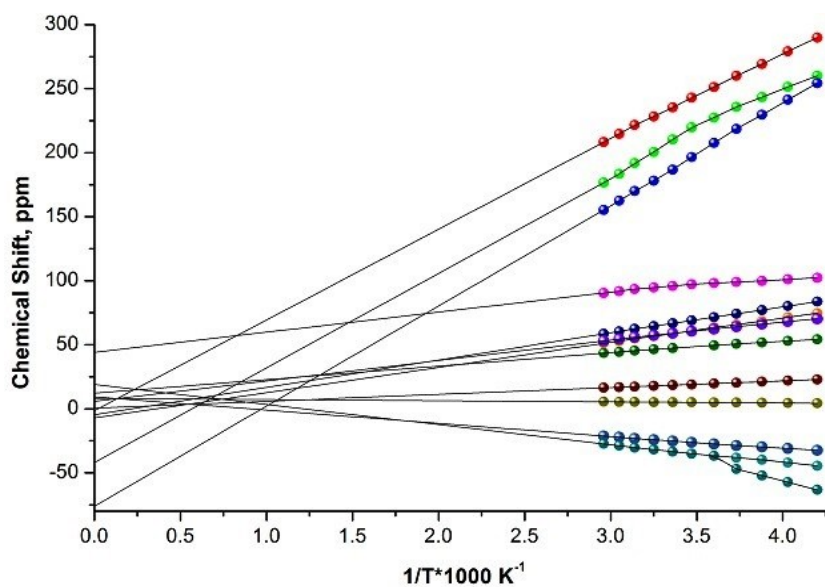

**Figure S10.** Curie plots showing the temperature dependence of  $^1\text{H}$  NMR resonances of **2** in the range 238 -338K

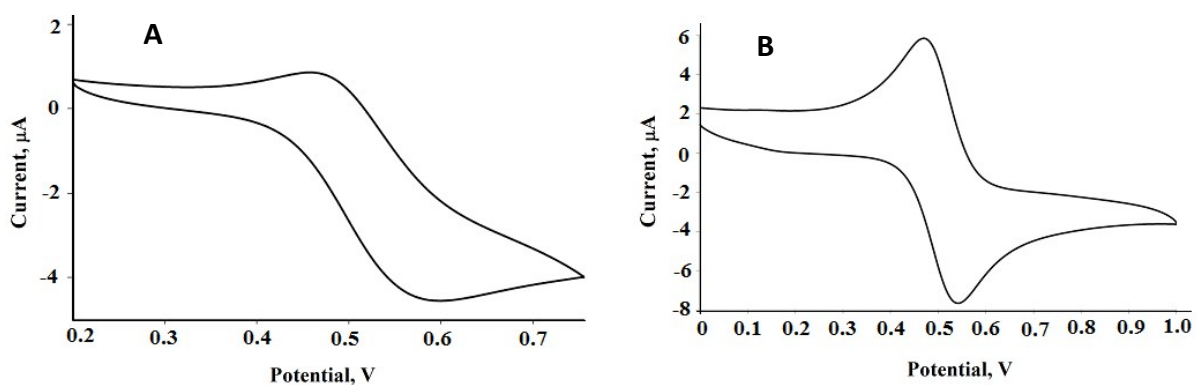

**Figure S11.** CV of Co(II) amine complex, **1** (A) and imine complex, **2** (B) in  $\text{CH}_3\text{CN}$



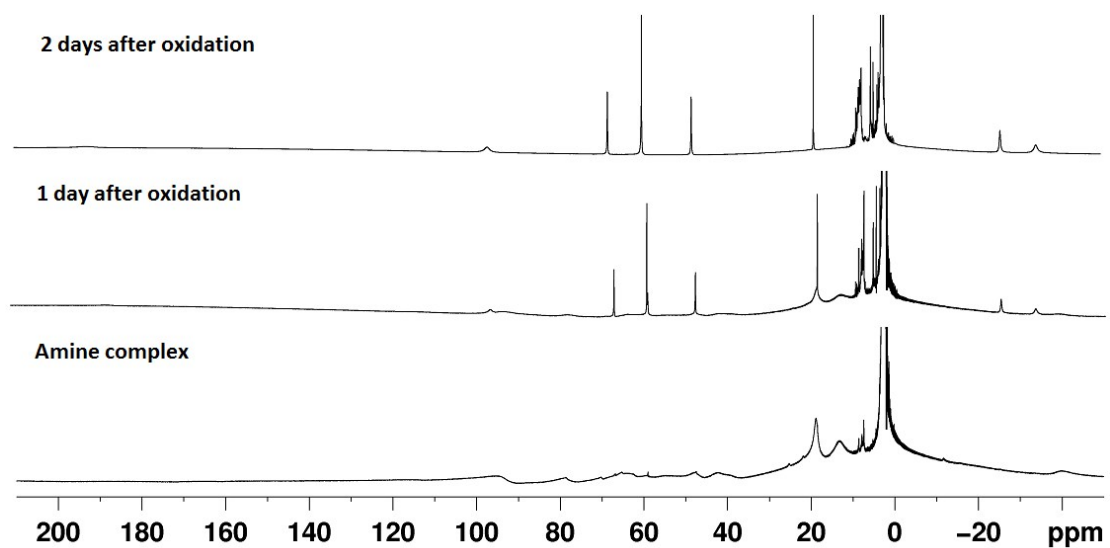

**Figure S12.**  $^1\text{H}$  NMR spectra of Co(II) amine complex **1** in  $\text{CD}_3\text{CN}$  after 24 and 48h of  $\text{O}_2$  passage

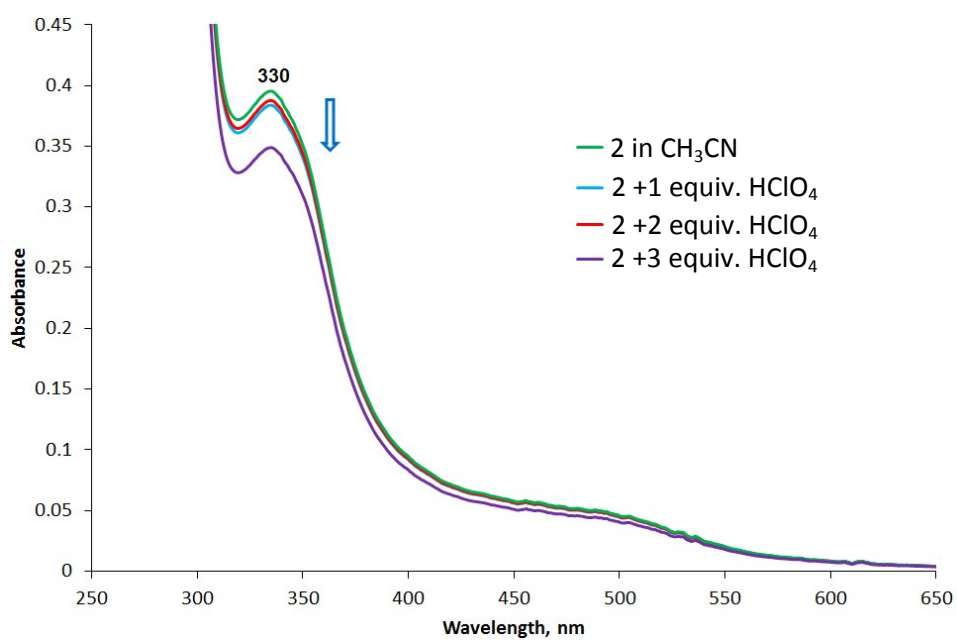

**Figure S13.** UV-Vis spectra of Co(II) imine complex **2** in  $\text{CH}_3\text{CN}$  in presence of acid, showing its decomposition

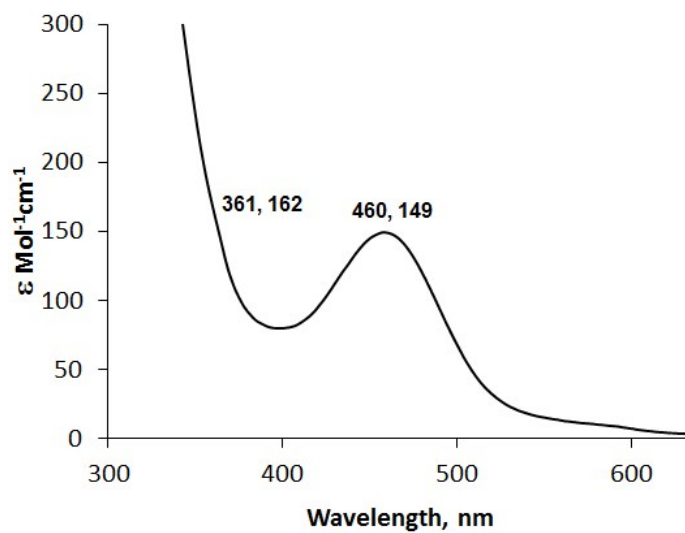

Figure S14. UV-Vis spectra of Co(III) complex 4

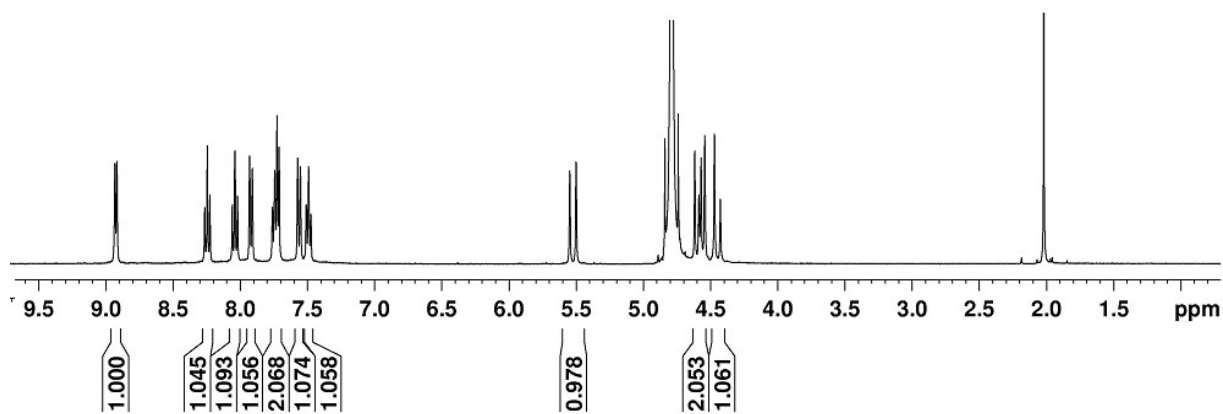

Figure S15.  $^1\text{H}$  NMR of Co(III) Complex 4 in  $\text{D}_2\text{O}$

QTOF MICRO

NNM-AJ2-108 8 (0.149) Sb (3,40.00); Sm (Mn, 2x3.00); Cm (1:53)

09-Oct-2012 16:57:40

TOF MS ES+  
7.37e3

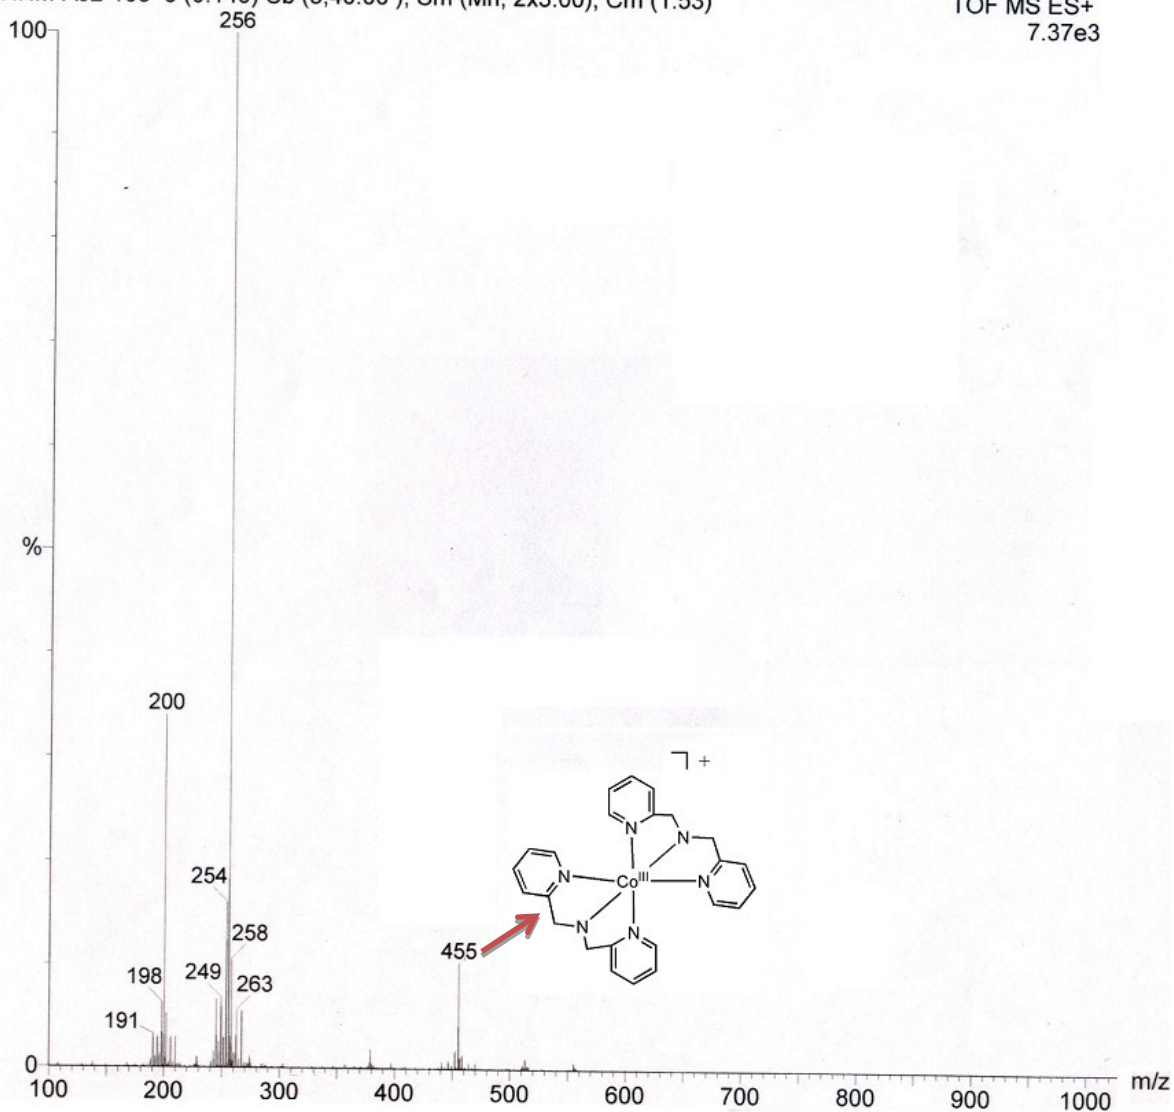

Figure S16. ESI-MS of Co(III) complex 4
